# Supplementary material for: Evaluation of Density-Based Spatial Clustering for Identifying Genomic Loci Associated with Ischemic Stroke in Genome-Wide Data
Source: Int J Mol Sci. 2023 Oct 19;24(20):15355. doi: 10.3390/ijms242015355 (PMC10607504; doi:10.3390/ijms242015355)
Supplement: Supplementary file 1 [file ijms-24-15355-s001.zip]

Archive with 7 entries (7 files):
- supplementary figures.pdf
- Table_S1.xls
- Table_S2.xls
- Table_S3.xls
- Table_S4.xls
- Table_S5.xlsx
- Table_S6.xls
