# Supplementary material for: Evaluation of Density-Based Spatial Clustering for Identifying Genomic Loci Associated with Ischemic Stroke in Genome-Wide Data
Source: Int J Mol Sci. 2023 Oct 19;24(20):15355. doi: 10.3390/ijms242015355 (PMC10607504; doi:10.3390/ijms242015355)
Supplement: Supplementary file 1 [file ijms-24-15355-s001.zip › Table_S1.xls]

## Sheet: DBSCAN
LOCUS	CHISQ	DF	P	SNPS	CHR	START	END	LENGTH	SIZE	BONF	HOLM	BH
1:22547290-22588355	38.07	6	1.086e-06	rs7552560|rs12749135|rs10489160|rs12239548|rs2143101|rs4654790	1	22547290	22588355	41065	6	0.0446694	0.044602	0.00069165
1:160991821-161037857	46.25	3	5.027e-10	rs6695707|rs2073653|rs6686076|rs6427573|rs1556260|rs1556259|rs4617422|rs16832617	1	160991821	161037857	46036	8	2.06771e-05	2.06745e-05	3.44618e-06
1:188318757-188359083	29.87	2	3.271e-07	rs6665263|rs1489256|rs10912364	1	188318757	188359083	40326	3	0.0134543	0.0134435	0.000385583
1:208063808-208158787	70.13	10	4.193e-11	rs2745954|rs2745955|rs2259397|rs2796254|rs2488250|rs1074327|rs11579848|rs12066493|rs11579530|rs11579568|rs11118962|rs2184820|rs475774	1	208063808	208158787	94979	13	1.72466e-06	1.72458e-06	5.74888e-07
1:245534945-245555664	47.89	10	6.491e-07	rs1173844|rs1173843|rs1173842|rs551022|rs482106|rs685556|rs1174002|rs1173663|rs491725|rs819876	1	245534945	245555664	20719	10	0.0266988	0.0266683	0.000556225
2:123818682-123955792	38	6	1.124e-06	rs17368508|rs13018548|rs10171294|rs7602084|rs10171011|rs1567977|rs1567979|rs7605383|rs977116|rs13399519|rs12711617|rs1913660	2	123818682	123955792	137110	12	0.0462324	0.0461593	0.00070049
2:125163827-125256443	33.7	3	2.29e-07	rs1835353|rs11123042|rs11123043|rs2003039|rs1574504|rs1827596	2	125163827	125256443	92616	6	0.00941923	0.00941327	0.00034886
2:135762061-136817088	52.43	9	3.74e-08	rs6712127|rs16831243|rs7582173|rs7570971|rs1869829|rs10445686|rs6730157|rs1375131|rs1900741|rs935613|rs12465802|rs961360|rs2278731|rs4954276|rs1900306|rs2289959|rs6753232|rs313518|rs313519|rs313528|rs724326|rs6739713|rs10202489|rs1438307|rs3213889|rs1050115|rs6724569|rs9287442|rs10188066|rs10496737|rs1469996|rs6760329|rs3213890|rs2015532|rs2322659|rs3769013|rs2322660|rs2304371|rs12988076|rs216421…	2	135762061	136817088	1055027	73	0.00153834	0.00153778	9.61461e-05
2:206170512-206262570	50.69	6	3.416e-09	rs1113314|rs7594732|rs11692923|rs1861509|rs3856509|rs4119081|rs1207439|rs2541155|rs3845806|rs12476682|rs4505506|rs849252|rs861066|rs10490292|rs10490290|rs849205|rs849203|rs2193077|rs1606237|rs7600287|rs849227	2	206170512	206262570	92058	21	0.000140507	0.000140483	1.75634e-05
2:206218161-206261029	60.56	4	2.212e-12	rs849250|rs2668145|rs1990667|rs698904|rs698905|rs849235|rs698906|rs849230	2	206218161	206261029	42868	8	9.0984e-08	9.09818e-08	4.5492e-08
3:55112415-55144055	36.45	5	7.725e-07	rs11130451|rs17323502|rs358010|rs358012|rs358017|rs358019|rs358024|rs697928	3	55112415	55144055	31640	8	0.0317745	0.0317343	0.000589583
3:55935470-55943591	37.28	2	8.023e-09	rs6774470|rs13072547	3	55935470	55943591	8121	2	0.000330002	0.000329914	2.75002e-05
3:118908226-118909538	29.94	2	3.146e-07	rs9835060|rs9878996	3	118908226	118909538	1312	2	0.0129401	0.0129301	0.000385583
3:125733081-125787632	30.8	3	9.36e-07	rs883207|rs3804587|rs11925965|rs7633958|rs7646705|rs7649483|rs9840962|rs12633421|rs6795856|rs6808519|rs4308226|rs4314124	3	125733081	125787632	54551	12	0.0384996	0.0384453	0.000650982
3:189185757-189205443	27.73	2	9.496e-07	rs185465|rs1152857|rs6765410|rs7627569|rs1424816|rs7652759|rs9850625|rs7636647	3	189185757	189205443	19686	8	0.0390589	0.0390029	0.000650982
4:75937971-75952499	33.86	4	7.978e-07	rs3822109|rs3775527|rs1062293|rs10049553|rs4859933	4	75937971	75952499	14528	5	0.0328151	0.032772	0.000589583
4:96236932-96310236	45.31	5	1.253e-08	rs10856912|rs6532549|rs2626053|rs2626043|rs2621459|rs2865448|rs10461172|rs10516969|rs10516970	4	96236932	96310236	73304	9	0.000515384	0.000515234	3.96449e-05
4:99555740-99573992	28.83	2	5.504e-07	rs12509052|rs10856938|rs17027889	4	99555740	99573992	18252	3	0.0226391	0.0226148	0.00050309
4:144520782-144559530	60.72	3	4.123e-13	rs984693|rs10519696|rs1497614|rs13149438|rs1909022|rs1018092|rs1391187|rs6851874|rs1497608|rs1024058|rs1450237	4	144520782	144559530	38748	11	1.69587e-08	1.69587e-08	1.69587e-08
4:145431497-145463231	34.2	4	6.784e-07	rs1512282|rs1032297|rs720485|rs6828540	4	145431497	145463231	31734	4	0.0279039	0.0278714	0.000569468
4:161059762-161114166	42.2	7	4.752e-07	rs17039226|rs17328104|rs17262338|rs17328221|rs11725207|rs11723182|rs1882684|rs1316398|rs1316399|rs6852530|rs17262799|rs12331818|rs11941120|rs17329555|rs1922869	4	161059762	161114166	54404	15	0.0195459	0.0195255	0.000444226
4:161307463-161314077	58.82	6	7.824e-11	rs1946867|rs10014285|rs2028323|rs6536518|rs1898866|rs7677076|rs7674486	4	161307463	161314077	6614	7	3.21817e-06	3.21793e-06	8.04542e-07
4:162385159-162458688	38.06	6	1.093e-06	rs17398873|rs4510426|rs17339916|rs17399436|rs17340154|rs13104132|rs4355345	4	162385159	162458688	73529	7	0.0449573	0.0448873	0.00069165
5:865411-896983	29.17	2	4.644e-07	rs7702501|rs920980	5	865411	896983	31572	2	0.0191017	0.0190822	0.000444226
5:15580207-15741441	46.46	7	7.118e-08	rs1549696|rs4510586|rs2914762|rs12659622|rs6892081|rs17703964|rs17602097|rs17523908|rs7733676|rs17602350|rs6877517|rs17602533	5	15580207	15741441	161234	12	0.00292778	0.00292649	0.000154093
5:15683828-15770553	46.76	9	4.349e-07	rs4235553|rs12655356|rs11951416|rs6885069|rs10866514|rs4701638|rs12152734|rs4702100|rs6554895|rs4701641|rs11133822|rs4407633|rs7704590|rs6875955|rs7704277|rs12519807|rs12659413|rs4273602|rs4571472|rs11748790|rs4133004|rs4235556|rs4293917|rs2937075|rs924455|rs2937074|rs1909722|rs1394657|rs2937072	5	15683828	15770553	86725	29	0.0178883	0.0178713	0.00043931
5:38904363-38917574	28	2	8.334e-07	rs1239334|rs1239339|rs357260	5	38904363	38917574	13211	3	0.0342794	0.0342327	0.000601393
5:54370089-54834537	45.37	9	7.894e-07	rs10037065|rs3111191|rs10055799|rs1876681|rs2069187|rs2069186|rs3136556|rs8192914|rs1051846|rs3091251|rs10043664|rs1021580|rs2992406|rs1335673|rs12653221|rs17682812|rs3747725|rs1109967|rs10041502|rs189208|rs455321|rs334877|rs334882|rs334891|rs151237|rs151240|rs163098|rs186740|rs170779|rs2455318|rs7730157|rs2606585|rs6876554|rs7710395|rs10062324|rs10074787|rs10077595|rs2305678|rs2085398|rs2061242|…	5	54370089	54834537	464448	76	0.0324696	0.0324278	0.000589583
5:132655046-132657126	32.37	3	4.379e-07	rs1079229|rs733023|rs10455054|rs9686988	5	132655046	132657126	2080	4	0.0180117	0.0179942	0.00043931
5:140757301-140940025	34.45	4	6.034e-07	rs17603019|rs11575963|rs251021|rs397327|rs17524736	5	140757301	140940025	182724	5	0.024819	0.0247919	0.000539545
5:174069668-174076982	38.45	5	3.064e-07	rs11749255|rs6864763|rs13163544|rs13168780|rs4868438|rs11744357|rs7720077	5	174069668	174076982	7314	7	0.0126028	0.0125937	0.000385583
6:16208742-16226268	33.54	3	2.474e-07	rs9358087|rs4712278|rs9367903	6	16208742	16226268	17526	3	0.0101761	0.0101691	0.000350899
6:95093849-95171786	27.6	2	1.016e-06	rs9363194|rs16872954|rs9452694|rs7741388|rs9294602|rs7762234|rs1590283	6	95093849	95171786	77937	7	0.0417901	0.0417281	0.000674034
6:95891910-96000122	42.28	8	1.201e-06	rs9399724|rs2613565|rs9386748|rs7749777|rs729278|rs11153257|rs4448101|rs9400554	6	95891910	96000122	108212	8	0.0493995	0.0493203	0.000728278
6:114654688-114800377	39.99	6	4.581e-07	rs17325929|rs2294232|rs1323047|rs2349468|rs9488390|rs10155761|rs10080647|rs9320493|rs9374461|rs1408454|rs6568842	6	114654688	114800377	145689	11	0.0188426	0.0188238	0.000444226
6:161369945-161498472	32.69	3	3.748e-07	rs9365235|rs9355861|rs590988|rs644110|rs13200744|rs12665456|rs12174748|rs9458114	6	161369945	161498472	128527	8	0.0154163	0.0154024	0.000405691
7:9448142-9530543	36.58	5	7.26e-07	rs12537330|rs10266127|rs7458742|rs2251806|rs2709091	7	9448142	9530543	82401	5	0.0298618	0.0298263	0.000586764
7:103909059-104004677	31.66	2	1.336e-07	rs12056177|rs10487197|rs17136540|rs1858915|rs9792096|rs10487202	7	103909059	104004677	95618	6	0.00549524	0.00549243	0.000249783
8:40831294-40834880	29.95	2	3.139e-07	rs10094981|rs11987006	8	40831294	40834880	3586	2	0.0129113	0.0129016	0.000385583
9:7906830-7935389	36.59	4	2.185e-07	rs10815710|rs12347060|rs10815712|rs16926845|rs11999820|rs875917|rs10815718	9	7906830	7935389	28559	7	0.00898734	0.00898188	0.000345667
9:13745502-13762909	45.67	7	1.015e-07	rs10961216|rs10810013|rs930543|rs10738341|rs10810020|rs1327510|rs10756492|rs1011529|rs11789440|rs10738342|rs10756494|rs10756496	9	13745502	13762909	17407	12	0.0041749	0.00417297	0.000208745
9:13859052-13898481	59.19	10	5.167e-09	rs12341720|rs10117920|rs7858214|rs2224553|rs10810049|rs12001888|rs12006148|rs13300686|rs10810054|rs2382423|rs10961291|rs6474794|rs12344958|rs7036035|rs9969743|rs13292371	9	13859052	13898481	39429	16	0.000212529	0.000212483	2.12529e-05
9:81190597-81221542	32.88	3	3.414e-07	rs9695134|rs1505641|rs1505637|rs6559398|rs885007|rs6559399|rs234803	9	81190597	81221542	30945	7	0.0140425	0.0140305	0.000390068
10:9436362-9521776	38.71	5	2.721e-07	rs10905551|rs7091933|rs10795712|rs933079|rs1335239|rs12783041|rs7903944|rs10752163|rs972701|rs10795716|rs10508394|rs4749862|rs1335229|rs17515084	10	9436362	9521776	85414	14	0.011192	0.0111841	0.000373067
10:14713077-14733465	53.6	5	2.533e-10	rs11259252|rs10906742|rs6602751|rs7922034|rs2948719|rs3107803	10	14713077	14733465	20388	6	1.04187e-05	1.04177e-05	2.08375e-06
10:15070615-15072216	37.75	3	3.2e-08	rs10906803|rs12244761	10	15070615	15072216	1601	2	0.00131622	0.00131578	8.77483e-05
10:50143377-50189949	41.65	4	1.973e-08	rs10857661|rs10776658|rs2457466|rs2663067|rs2663028|rs7098224|rs3829206|rs4614357|rs7091429|rs11101573|rs2292585|rs7093656	10	50143377	50189949	46572	12	0.000811534	0.000811278	5.79667e-05
10:91070950-91085607	28.26	2	7.313e-07	rs1888923|rs4934471|rs7095398	10	91070950	91085607	14657	3	0.0300798	0.0300433	0.000586764
10:125334949-125370113	35.19	3	1.113e-07	rs1317737|rs1588960|rs2486040|rs12415481	10	125334949	125370113	35164	4	0.00457799	0.00457577	0.000218
10:125383328-125399966	40	4	4.333e-08	rs11248604|rs11248605|rs10902964|rs10794626|rs12762474	10	125383328	125399966	16638	5	0.00178225	0.00178156	0.000104838
10:127197908-127236208	44.58	7	1.649e-07	rs12768691|rs7088247|rs4962465|rs10901394|rs12415476|rs10901399|rs7077246|rs12572240|rs4962309|rs9630114|rs755606|rs919831|rs17153141|rs1036259	10	127197908	127236208	38300	14	0.00678267	0.00677887	0.000282611
11:25394425-25624144	41.13	3	6.145e-09	rs2404071|rs10767373|rs12807415|rs2028614|rs4336989|rs1561937|rs17308120|rs2120148|rs1115420	11	25394425	25624144	229719	9	0.000252756	0.000252695	2.29778e-05
11:76806522-76833338	36.37	5	8.027e-07	rs4945142|rs2233549|rs11237090|rs4945146	11	76806522	76833338	26816	4	0.0330167	0.0329725	0.000589583
11:130089026-130089380	40.08	2	1.983e-09	rs516017|rs1102478	11	130089026	130089380	354	2	8.15648e-05	8.15529e-05	1.16521e-05
13:86426757-86508825	30.28	3	1.204e-06	rs1330036|rs1169361|rs449921|rs1034052|rs9566115	13	86426757	86508825	82068	5	0.0495229	0.0494423	0.000728278
14:86850171-86923336	38.55	6	8.783e-07	rs9323788|rs7143328|rs17122289|rs7153976|rs7147578|rs17122299|rs17122386|rs7492828	14	86850171	86923336	73165	8	0.0361262	0.0360762	0.000622866
14:99102622-99135675	44.62	4	4.775e-09	rs10141803|rs7153492|rs7150312|rs7150744|rs11160473|rs10139504	14	99102622	99135675	33053	6	0.000196405	0.000196367	2.12529e-05
15:48006578-48069167	37.05	4	1.759e-07	rs1347891|rs9920036|rs11070610|rs532598|rs11855337|rs652856	15	48006578	48069167	62589	6	0.00723512	0.0072309	0.000289405
15:48009994-48045248	32.79	3	3.572e-07	rs12592594|rs687566|rs11629796	15	48009994	48045248	35254	3	0.0146924	0.0146795	0.000397091
15:69411315-69561518	40.52	7	1.001e-06	rs12708499|rs12708500|rs11072067|rs11631403|rs1553251|rs1553253|rs7183421|rs10851801|rs12438916|rs8041810|rs10162608|rs4777127|rs3865014	15	69411315	69561518	150203	13	0.0411731	0.0411131	0.000674034
16:3082327-3097295	36.42	4	2.375e-07	rs2717713|rs1859376|rs2360166|rs879734	16	3082327	3097295	14968	4	0.00976885	0.00976244	0.000348887
17:31862983-31888205	34.01	4	7.418e-07	rs4794957|rs12937613|rs12948250|rs8074314|rs1013626|rs7224916|rs964459	17	31862983	31888205	25222	7	0.0305117	0.0304739	0.000586764
17:31870759-31881235	33.56	2	5.159e-08	rs8079016|rs9915789|rs9898999	17	31870759	31881235	10476	3	0.002122	0.00212112	0.000117889
17:32795684-32810443	32.42	3	4.261e-07	rs4331381|rs1367955|rs17614930|rs891754	17	32795684	32810443	14759	4	0.0175263	0.0175102	0.00043931
17:47482953-47490102	29.86	2	3.281e-07	rs2898883|rs2233669|rs7502499	17	47482953	47490102	7149	3	0.0134954	0.0134843	0.000385583
18:22150652-22345276	49.1	9	1.59e-07	rs7236338|rs1945161|rs949355|rs12604703|rs12956951|rs8098317|rs12162183|rs12605059|rs7240925|rs16940910|rs880424|rs880423|rs7241648|rs12954479|rs7235533|rs8089707|rs8090266|rs9653026|rs10502453|rs11083085|rs11873104|rs1600815|rs9949265|rs1481941|rs7230327|rs7233467|rs12968400	18	22150652	22345276	194624	27	0.00653999	0.00653649	0.000282611
21:36897326-37049608	41.53	7	6.391e-07	rs387224|rs449004|rs928287|rs2205031|rs2205030|rs764508|rs2242926|rs2835016|rs1888457|rs2835035|rs2242752|rs2242753|rs1734501|rs909446|rs9980814|rs2835079	21	36897326	37049608	152282	16	0.0262875	0.0262581	0.000556225
22:37981729-37995452	35.71	5	1.088e-06	rs5995472|rs7290515|rs2413472	22	37981729	37995452	13723	3	0.0447516	0.0446831	0.00069165

## Sheet: HDBSCAN
LOCUS	CHISQ	DF	P	SNPS	CHR	START	END	LENGTH	SIZE	BONF	HOLM	BH
1:77548843-77607160	31.87	3	5.561e-07	rs2223697|rs12744696|rs10493598|rs7524360|rs7522727|rs12760157|rs2689674|rs2689675|rs858447	1	77548843	77607160	58317	9	0.0249366	0.0249038	0.000406616
1:111181086-111228409	51.84	7	6.279e-09	rs2640500|rs2821550|rs2797534|rs2797535|rs2797537|rs2797523|rs2640487|rs2640482|rs1319782|rs2640480|rs1058184|rs2821557|rs2840380	1	111181086	111228409	47323	13	0.000281563	0.000281488	2.16587e-05
1:112513203-112548118	65.24	11	9.7e-10	rs894846|rs17676657|rs3017627|rs1373286|rs3008542|rs3008527|rs7513088|rs7528073|rs10745323|rs3008530|rs3000752|rs3000754	1	112513203	112548118	34915	12	4.34967e-05	4.349e-05	5.43709e-06
1:160991821-161037857	46.25	3	5.027e-10	rs6695707|rs2073653|rs6686076|rs6427573|rs1556260|rs1556259|rs4617422|rs16832617	1	160991821	161037857	46036	8	2.25421e-05	2.25396e-05	3.75701e-06
1:188318757-188359083	29.87	2	3.271e-07	rs6665263|rs1489256|rs10912364	1	188318757	188359083	40326	3	0.0146678	0.0146528	0.000306514
1:208051059-208158787	60.95	12	1.517e-08	rs2745948|rs2745954|rs2745955|rs2259397|rs2796254|rs2488250|rs1074327|rs11579848|rs12066493|rs11579530|rs11579568|rs11118962|rs2184820|rs475774	1	208051059	208158787	107728	14	0.000680253	0.000680026	4.25158e-05
1:245534945-245555664	47.89	10	6.491e-07	rs1173844|rs1173843|rs1173842|rs551022|rs482106|rs685556|rs1174002|rs1173663|rs491725|rs819876	1	245534945	245555664	20719	10	0.0291069	0.0290641	0.000429428
2:56280428-56376308	58.12	10	8.215e-09	rs891881|rs11693561|rs973238|rs7567390|rs1432567|rs4347872|rs2868993|rs2868994|rs6751715|rs3850355|rs2111469	2	56280428	56376308	95880	11	0.000368377	0.000368262	2.45585e-05
2:125163827-125177190	29.91	2	3.193e-07	rs1835353|rs11123042|rs11123043	2	125163827	125177190	13363	3	0.0143181	0.0143043	0.000306514
2:135762061-136817088	51.45	10	1.441e-07	rs6712127|rs16831243|rs7582173|rs7570971|rs1869829|rs10445686|rs6730157|rs1375131|rs1900741|rs935613|rs12465802|rs961360|rs2278731|rs4954276|rs1900306|rs2289959|rs6753232|rs313518|rs313519|rs313528|rs724326|rs6739713|rs10202489|rs1438307|rs3213889|rs1050115|rs6724569|rs9287442|rs10188066|rs10496737|rs1469996|rs6760329|rs3213890|rs2015532|rs2322659|rs3769013|rs2322660|rs2304371|rs12988076|rs216421…	2	135762061	136817088	1055027	72	0.00646173	0.00645712	0.00019581
2:140908752-140930736	44.04	8	5.598e-07	rs2950606|rs7568724|rs1405923|rs12328474|rs10174088|rs884460|rs2220697|rs1527860	2	140908752	140930736	21984	8	0.0251026	0.025069	0.000406616
2:206144833-206262570	61.56	8	2.304e-10	rs7606468|rs1921799|rs1113314|rs7594732|rs11692923|rs1207412|rs1861509|rs3856509|rs4119081|rs1207439|rs2541155|rs3845806|rs12476682|rs4505506|rs849252|rs861066|rs10490292|rs10490290|rs849205|rs849203|rs2193077|rs1606237|rs7600287|rs849227	2	206144833	206262570	117737	24	1.03316e-05	1.03307e-05	2.06632e-06
3:55935470-55943591	37.28	2	8.023e-09	rs6774470|rs13072547	3	55935470	55943591	8121	2	0.000359767	0.000359663	2.45585e-05
3:110941158-111044977	51.14	12	8.807e-07	rs7372838|rs7430044|rs4410442|rs2971370|rs2958070|rs6437970|rs4682248|rs2958067|rs1489040|rs6437972|rs4682036|rs13084169|rs1489024|rs7629508|rs9854607|rs2971355|rs12637512|rs10804486|rs2958081|rs1873105|rs1881678	3	110941158	111044977	103819	21	0.0394923	0.0394289	0.000540991
3:118908226-118909538	29.94	2	3.146e-07	rs9835060|rs9878996	3	118908226	118909538	1312	2	0.0141073	0.0140941	0.000306514
3:125733081-125787632	30.8	3	9.36e-07	rs883207|rs3804587|rs11925965|rs7633958|rs7646705|rs7649483|rs9840962|rs12633421|rs6795856|rs6808519|rs4308226|rs4314124	3	125733081	125787632	54551	12	0.0419721	0.0419038	0.00056477
4:75937971-75967200	44.58	5	1.765e-08	rs3822109|rs3775527|rs1062293|rs10049553|rs4859933|rs10028207	4	75937971	75967200	29229	6	0.000791461	0.000791179	4.65565e-05
4:96220207-96304133	46.27	6	2.611e-08	rs4699847|rs10856912|rs6532549|rs2626053|rs2626043|rs2621459|rs2865448|rs10461172	4	96220207	96304133	83926	8	0.00117082	0.00117035	6.16223e-05
4:99555740-99573992	29.26	2	4.433e-07	rs12509052|rs17027889	4	99555740	99573992	18252	2	0.0198785	0.0198545	0.000361427
4:144520782-144559530	60.72	3	4.123e-13	rs984693|rs10519696|rs1497614|rs13149438|rs1909022|rs1018092|rs1391187|rs6851874|rs1497608|rs1024058|rs1450237	4	144520782	144559530	38748	11	1.84884e-08	1.84884e-08	1.84884e-08
4:145410477-145463231	34.38	4	6.239e-07	rs13142879|rs1512282|rs1032297|rs720485|rs6828540	4	145410477	145463231	52754	5	0.0279769	0.027937	0.000429428
4:154015564-154053258	80.7	18	6.466e-10	rs13130102|rs2176304|rs7662116|rs1516689|rs1588982|rs6535898|rs11725217|rs6849116|rs10032068|rs17278106|rs4323085	4	154015564	154053258	37694	11	2.89948e-05	2.8991e-05	4.14212e-06
4:161291816-161314077	61.95	8	1.926e-10	rs2350244|rs1946867|rs10014285|rs2028323|rs6536518|rs1898866|rs7677076|rs7674486	4	161291816	161314077	22261	8	8.63657e-06	8.63599e-06	2.06632e-06
5:852207-969285	44.67	9	1.061e-06	rs7702532|rs12518024|rs13179524|rs4957112|rs4957114|rs12653180|rs10071835	5	852207	969285	117078	7	0.0475774	0.0474967	0.000617888
5:15580207-15785038	43.38	6	9.803e-08	rs1549696|rs10520818|rs4510586|rs2914762|rs12659622|rs6892081|rs17703964|rs17602097|rs17523908|rs7733676|rs17602350|rs6877517|rs17602533|rs1909723|rs1973477|rs952161|rs10462723|rs1505035|rs1505039|rs13183703	5	15580207	15785038	204831	20	0.00439586	0.00439321	0.000152818
5:15683828-15753722	47.07	9	3.806e-07	rs4235553|rs12655356|rs11951416|rs6885069|rs10866514|rs17704215|rs4701638|rs12152734|rs4702100|rs6554895|rs4701641|rs11133822|rs4407633|rs7704590|rs6875955|rs7704277|rs12519807|rs12659413|rs4273602|rs4374757|rs4571472|rs11748790|rs4133004|rs4235556|rs4293917|rs2937075|rs924455|rs2937074|rs2937076|rs2133761	5	15683828	15753722	69894	30	0.0170669	0.0170475	0.000328209
5:38904363-38917574	28	2	8.334e-07	rs1239334|rs1239339|rs357260	5	38904363	38917574	13211	3	0.0373713	0.0373122	0.000519046
5:54370089-54834537	45.37	9	7.894e-07	rs10037065|rs3111191|rs10055799|rs1876681|rs2069187|rs2069186|rs3136556|rs8192914|rs1051846|rs3091251|rs10043664|rs1021580|rs2992406|rs1335673|rs12653221|rs17682812|rs3747725|rs1109967|rs10041502|rs189208|rs455321|rs334877|rs334882|rs334891|rs151237|rs151240|rs163098|rs186740|rs170779|rs2455318|rs7730157|rs2606585|rs6876554|rs7710395|rs10062324|rs10074787|rs10077595|rs2305678|rs2085398|rs2061242|…	5	54370089	54834537	464448	76	0.0353983	0.0353438	0.00050569
5:128340794-128428962	39.04	5	2.331e-07	rs1181975|rs31271|rs257924|rs257921|rs42563|rs42265|rs192299|rs3756747	5	128340794	128428962	88168	8	0.0104527	0.0104436	0.000261317
5:132655046-132657126	32.37	3	4.379e-07	rs1079229|rs733023|rs10455054|rs9686988	5	132655046	132657126	2080	4	0.0196363	0.0196131	0.000361427
5:140757301-140940025	34.45	4	6.034e-07	rs17603019|rs11575963|rs251021|rs397327|rs17524736	5	140757301	140940025	182724	5	0.0270577	0.0270196	0.000422776
5:168843083-168875288	46.42	7	7.239e-08	rs2112333|rs10041224|rs7729168|rs10475909|rs2338656|rs6864076|rs4868643|rs6555864|rs6890239	5	168843083	168875288	32205	9	0.00324611	0.00324445	0.000131531
5:174069668-174089439	41.42	5	7.734e-08	rs11749255|rs6864763|rs13163544|rs13168780|rs11744357|rs7720077|rs9765586|rs11738361	5	174069668	174089439	19771	8	0.00346808	0.00346615	0.000133388
6:303017-439985	71.23	21	2.226e-07	rs7754000|rs9378774|rs1033180|rs9503555|rs6899334|rs6930635|rs12203592|rs1775589|rs2671422|rs1877179|rs3778607|rs2001508|rs17825664|rs3800262|rs1050976|rs7768807|rs1877175|rs872071|rs6906608|rs7757906|rs11242867|rs9378805|rs9378808|rs9378374|rs7748534|rs950286|rs9405666|rs9328192|rs872468	6	303017	439985	136968	29	0.00998183	0.00997337	0.000255944
6:16203324-16226268	35.79	4	3.193e-07	rs7748814|rs9358087|rs4712278|rs9367903	6	16203324	16226268	22944	4	0.0143181	0.0143043	0.000306514
6:95065361-95152928	80.57	20	3.142e-09	rs461442|rs12204226|rs462384|rs12176373|rs458788|rs449578|rs9354114|rs404945|rs384105|rs390661|rs373754|rs2325585|rs4374804|rs12196652|rs11753129|rs9445244|rs1033581|rs6941040|rs6914928|rs6454996|rs9345481|rs7769154|rs13212400|rs9345483|rs9354118|rs2207428	6	95065361	95152928	87567	26	0.000140894	0.000140862	1.28085e-05
6:95093849-95171786	27.6	2	1.016e-06	rs9363194|rs16872954|rs9452694|rs7741388|rs9294602|rs7762234|rs1590283	6	95093849	95171786	77937	7	0.0455595	0.0454833	0.000599467
6:101866368-101933529	61.06	15	1.656e-07	rs1856309|rs1361168|rs1832415|rs2852525|rs1465168|rs1465169|rs2787565|rs997279|rs2788274|rs1856310|rs2518160|rs1338167|rs2788279|rs990386|rs2252682|rs2518171|rs989467|rs989466	6	101866368	101933529	67161	18	0.00742584	0.0074202	0.000212167
6:114654688-114800377	39.99	6	4.581e-07	rs17325929|rs2294232|rs1323047|rs2349468|rs9488390|rs10155761|rs10080647|rs9320493|rs9374461|rs1408454|rs6568842	6	114654688	114800377	145689	11	0.0205421	0.0205169	0.000366824
6:161369945-161498472	32.69	3	3.748e-07	rs9365235|rs9355861|rs590988|rs644110|rs13200744|rs12665456|rs12174748|rs9458114	6	161369945	161498472	128527	8	0.0168068	0.016788	0.000328209
7:37440628-37460441	28.82	2	5.518e-07	rs13241143|rs11765583|rs13245967|rs17171025|rs17171026|rs12540876	7	37440628	37460441	19813	6	0.0247438	0.0247118	0.000406616
7:37455031-37466643	36.63	4	2.149e-07	rs10253164|rs10260856|rs17261508|rs17202203|rs10280643	7	37455031	37466643	11612	5	0.00963655	0.00962881	0.000255944
7:103909059-104004677	31.66	2	1.336e-07	rs12056177|rs10487197|rs17136540|rs1858915|rs9792096|rs10487202	7	103909059	104004677	95618	6	0.00599089	0.00598688	0.000193255
7:103916484-103950365	41.78	7	5.741e-07	rs2040543|rs41508|rs7787013|rs9641326|rs10229129	7	103916484	103950365	33881	5	0.0257438	0.0257082	0.000408632
8:80658578-80754021	68.21	17	4.374e-08	rs2467781|rs2461043|rs1444547|rs7004035|rs2467774|rs1046472|rs960978|rs2920950|rs2956251|rs2467777|rs4739987|rs7819714|rs10957943|rs2920949|rs2467796|rs2467798|rs2467799|rs2247008|rs4329312|rs1838440|rs3863243|rs2457400|rs10110615|rs1396856|rs2467769|rs2467768|rs2457398|rs2467764|rs10109063|rs2467762|rs2467785	8	80658578	80754021	95443	31	0.00196139	0.00196051	9.02343e-05
9:7906830-7935389	36.59	4	2.185e-07	rs10815710|rs12347060|rs10815712|rs16926845|rs11999820|rs875917|rs10815718	9	7906830	7935389	28559	7	0.00979798	0.00978989	0.000255944
9:13744658-13762898	46.16	9	5.622e-07	rs1887456|rs10961216|rs10810013|rs930543|rs10738341|rs10810020|rs1327510|rs10756492|rs1011529|rs11789440|rs10738342|rs10756494|rs10961227	9	13744658	13762898	18240	13	0.0252102	0.0251759	0.000406616
9:13870997-13898956	42.61	5	4.427e-08	rs12001888|rs12006148|rs12344958|rs7036035|rs1923352	9	13870997	13898956	27959	5	0.00198516	0.00198423	9.02343e-05
9:81190597-81196948	32.57	3	3.974e-07	rs9695134|rs12551231|rs1505641|rs1505637	9	81190597	81196948	6351	4	0.0178202	0.0177995	0.00033623
9:117102046-117126074	37.19	5	5.486e-07	rs2636870|rs2250242|rs13292928|rs10817593|rs1249725|rs1249726|rs2636897|rs10122672|rs2787350	9	117102046	117126074	24028	9	0.0246003	0.0245691	0.000406616
10:9436362-9521776	38.71	5	2.721e-07	rs10905551|rs7091933|rs10795712|rs933079|rs1335239|rs12783041|rs7903944|rs10752163|rs972701|rs10795716|rs10508394|rs4749862|rs1335229|rs17515084	10	9436362	9521776	85414	14	0.0122015	0.0121906	0.000297598
10:14713077-14734417	57.71	6	1.314e-10	rs11259252|rs10906742|rs6602751|rs7922034|rs2948719|rs3107803|rs2609836	10	14713077	14734417	21340	7	5.89224e-06	5.89198e-06	1.96408e-06
10:36651214-36688528	45.06	7	1.33e-07	rs7911097|rs2800086|rs7911503|rs11010648|rs11010651|rs7898044|rs7085749|rs1936559|rs10827637	10	36651214	36688528	37314	9	0.00596399	0.00596013	0.000193255
10:91070950-91085607	28.26	2	7.313e-07	rs1888923|rs4934471|rs7095398	10	91070950	91085607	14657	3	0.032793	0.0327432	0.00047526
10:114598202-114676413	48	8	9.883e-08	rs17746088|rs12248007|rs2479118|rs2475176|rs11595267|rs12248034|rs11595716|rs17746501|rs2180964|rs1556014|rs7076475|rs17130147|rs7075934	10	114598202	114676413	78211	13	0.00443173	0.00442897	0.000152818
10:125383328-125399966	40	4	4.333e-08	rs11248604|rs11248605|rs10902964|rs10794626|rs12762474	10	125383328	125399966	16638	5	0.001943	0.00194218	9.02343e-05
10:127197908-127236208	44.58	7	1.649e-07	rs12768691|rs7088247|rs4962465|rs10901394|rs12415476|rs10901399|rs7077246|rs12572240|rs4962309|rs9630114|rs755606|rs919831|rs17153141|rs1036259	10	127197908	127236208	38300	14	0.00739445	0.007389	0.000212167
11:25394425-25624144	41.13	3	6.145e-09	rs2404071|rs10767373|rs12807415|rs2028614|rs4336989|rs1561937|rs17308120|rs2120148|rs1115420	11	25394425	25624144	229719	9	0.000275554	0.000275486	2.16587e-05
11:25700712-25720291	38.89	4	7.333e-08	rs17308279|rs1493669|rs2172583	11	25700712	25720291	19579	3	0.00328826	0.0032865	0.000131531
11:89217708-89243804	44.92	7	1.419e-07	rs497279|rs585197|rs1836882|rs319024|rs672549|rs490595	11	89217708	89243804	26096	6	0.00636308	0.00635868	0.00019581
11:130089026-130089380	40.08	2	1.983e-09	rs516017|rs1102478	11	130089026	130089380	354	2	8.89217e-05	8.89058e-05	9.88019e-06
12:68751405-68779413	53.92	12	2.829e-07	rs10878812|rs12424945|rs7133383|rs5011574|rs952218|rs11177196|rs373291|rs4913442|rs416350	12	68751405	68779413	28008	9	0.0126858	0.0126742	0.000302043
12:68794078-68817323	57.59	15	6.512e-07	rs7976934|rs10878819|rs7307444|rs918266|rs6581821|rs7971691|rs929713|rs2160890|rs10878821|rs6581822|rs10878822|rs6581824|rs10878824|rs7297456|rs10878825|rs7313354	12	68794078	68817323	23245	16	0.0292011	0.0291575	0.000429428
12:70871858-70943954	48.55	10	4.916e-07	rs429295|rs5022970|rs1390186|rs630608|rs1025408|rs445400|rs3752703|rs2278346|rs2278345|rs2567142|rs2584028|rs2567140|rs11178282|rs11178283|rs3782377	12	70871858	70943954	72096	15	0.0220443	0.0220168	0.000386743
12:106100211-106116323	52.74	10	8.304e-08	rs11833072|rs12321228|rs1962255|rs10507198|rs10778430|rs10861485|rs10746041|rs10746042|rs7975808|rs12427321|rs10778434|rs12814819|rs7956146|rs7975018|rs1819502	12	106100211	106116323	16112	15	0.00372368	0.00372152	0.000137914
12:106258749-106299442	46.27	8	2.116e-07	rs7963923|rs10861525|rs7972359|rs4964169|rs1421442|rs7296251|rs7971430	12	106258749	106299442	40693	7	0.00948857	0.00948116	0.000255944
13:86390794-86447071	38.59	3	2.123e-08	rs9575969|rs8181842|rs993922|rs9285339|rs9547403|rs9531863|rs4294705|rs366815	13	86390794	86447071	56277	8	0.000951996	0.000951635	5.28886e-05
14:99084602-99117486	50.62	3	5.901e-11	rs7359146|rs7359157|rs10150334|rs9323994|rs17599303|rs17527905	14	99084602	99117486	32884	6	2.64613e-06	2.64607e-06	1.32306e-06
14:99087169-99129176	51.24	6	2.651e-09	rs12433754|rs10142417|rs4905729|rs7161615|rs12898099|rs8014383|rs10137489|rs10141803|rs7153492|rs7150312|rs7150744|rs11160473	14	99087169	99129176	42007	12	0.000118876	0.000118852	1.18876e-05
15:48009994-48045248	32.79	3	3.572e-07	rs12592594|rs687566|rs11629796	15	48009994	48045248	35254	3	0.0160176	0.0160001	0.000320351
16:3064698-3097295	40.3	7	1.105e-06	rs2717700|rs2717713|rs2526279|rs1859376|rs2360166|rs879734	16	3064698	3097295	32597	6	0.0495504	0.0494642	0.00062722
17:31853074-31892814	47.28	9	3.479e-07	rs10512445|rs11652482|rs4794957|rs12937613|rs12948250|rs8074314|rs1013626|rs7224916|rs964459|rs6505358	17	31853074	31892814	39740	10	0.0156005	0.0155838	0.000318378
17:31860912-31881235	36.7	3	5.333e-08	rs1434586|rs8079016|rs9915789|rs9898999	17	31860912	31881235	20323	4	0.00239142	0.00239025	0.000103975
17:47482953-47490102	29.86	2	3.281e-07	rs2898883|rs2233669|rs7502499	17	47482953	47490102	7149	3	0.0147127	0.0146972	0.000306514
18:22137396-22329771	49.52	10	3.27e-07	rs17187688|rs7236338|rs1945161|rs949355|rs12604703|rs12956951|rs8098317|rs12162183|rs12605059|rs7240925|rs16940910|rs880424|rs880423|rs7241648|rs12954479|rs7235533|rs8089707|rs8090266|rs9653026|rs10502453|rs11083085|rs11873104|rs1600815|rs9949265	18	22137396	22329771	192375	24	0.0146633	0.0146486	0.000306514
18:74763117-74782712	58.89	16	8.04e-07	rs11150996|rs12607027|rs871673|rs7241461|rs4890888|rs11664952|rs12456480	18	74763117	74782712	19595	7	0.036053	0.0359967	0.000507788
21:20426064-20455028	36.01	5	9.446e-07	rs2180878|rs2025059|rs2825347|rs764063	21	20426064	20455028	28964	4	0.0423578	0.0422879	0.00056477
21:36897326-37049608	41.53	7	6.391e-07	rs387224|rs449004|rs928287|rs2205031|rs2205030|rs764508|rs2242926|rs2835016|rs1888457|rs2835035|rs2242752|rs2242753|rs1734501|rs909446|rs9980814|rs2835079	21	36897326	37049608	152282	16	0.0286585	0.028617	0.000429428
22:37981729-37995452	35.71	5	1.088e-06	rs5995472|rs7290515|rs2413472	22	37981729	37995452	13723	3	0.0487881	0.0487043	0.000625488
