# Supplementary material for: Evaluation of Density-Based Spatial Clustering for Identifying Genomic Loci Associated with Ischemic Stroke in Genome-Wide Data
Source: Int J Mol Sci. 2023 Oct 19;24(20):15355. doi: 10.3390/ijms242015355 (PMC10607504; doi:10.3390/ijms242015355)
Supplement: Supplementary file 1 [file ijms-24-15355-s001.zip › Table_S2.xls]

## Sheet: chi_square
CHR	SNP	A1	A2	TEST	AFF	UNAFF	CHISQ	DF	P
22	rs9606478	G	A	GENO	489/2116/2324	39/225/388	37.28	2	8.027e-09
22	rs9606478	G	A	TREND	3094/6764	303/1001	35.79	1	2.196e-09
22	rs9606478	G	A	ALLELIC	3094/6764	303/1001	36.13	1	1.849e-09
22	rs9606478	G	A	DOM	2605/2324	264/388	35.21	1	2.954e-09
22	rs7292279	A	G	GENO	1076/2493/1360	86/323/243	39.55	2	2.586e-09
22	rs7292279	A	G	TREND	4645/5213	495/809	39.5	1	3.284e-10
22	rs7292279	A	G	ALLELIC	4645/5213	495/809	38.89	1	4.492e-10
22	rs3761422	T	C	GENO	1169/2512/1248	105/298/249	53.34	2	2.612e-12
22	rs3761422	T	C	TREND	4850/5008	508/796	48.82	1	2.812e-12
22	rs3761422	T	C	ALLELIC	4850/5008	508/796	48.4	1	3.482e-12
22	rs3761422	T	C	DOM	3681/1248	403/249	48.6	1	3.143e-12
22	rs137425	A	G	GENO	949/2363/1617	72/283/297	51	2	8.438e-12
22	rs137425	A	G	TREND	4261/5597	427/877	50.55	1	1.162e-12
22	rs137425	A	G	ALLELIC	4261/5597	427/877	51.91	1	5.816e-13
22	rs137425	A	G	DOM	3312/1617	355/297	41.52	1	1.168e-10
22	rs4823464	G	A	GENO	662/2197/2070	53/241/358	42.33	2	6.417e-10
22	rs4823464	G	A	TREND	3521/6337	347/957	40.73	1	1.745e-10
22	rs4823464	G	A	ALLELIC	3521/6337	347/957	42.18	1	8.334e-11
22	rs4823464	G	A	DOM	2859/2070	294/358	39.06	1	4.114e-10

## Sheet: logistic_regression
CHR	SNP	BP	A1	TEST	NMISS	OR	SE	L95	U95	STAT	P
22	rs9606478	17305777	G	ADD	5581	1.508	0.06907	1.317	1.726	5.943	2.799e-09
22	rs7292279	19629837	A	ADD	5581	1.467	0.0613	1.301	1.654	6.249	4.138e-10
22	rs3761422	24826672	T	ADD	5581	1.526	0.0609	1.354	1.719	6.937	3.992e-12
22	rs137425	33591130	A	ADD	5581	1.549	0.06203	1.372	1.749	7.054	1.743e-12
22	rs4823464	47489470	G	ADD	5581	1.513	0.06539	1.331	1.72	6.337	2.346e-10
