# Supplementary material for: Evaluation of Density-Based Spatial Clustering for Identifying Genomic Loci Associated with Ischemic Stroke in Genome-Wide Data
Source: Int J Mol Sci. 2023 Oct 19;24(20):15355. doi: 10.3390/ijms242015355 (PMC10607504; doi:10.3390/ijms242015355)
Supplement: Supplementary file 1 [file ijms-24-15355-s001.zip › Table_S3.xls]

## Sheet: d2
CHR	SNP	A1	A2	TEST	AFF	UNAFF	CHISQ	DF	P	BONF
2	rs4669685	A	G	ALLELIC	2524/7334	444/860	42.08	1	8.751e-11	7.73508e-05
2	rs6739054	G	A	ALLELIC	2909/6949	497/807	40.21	1	2.276e-10	0.000201177
2	rs7581382	G	A	ALLELIC	1911/7947	163/1141	36.09	1	1.885e-09	0.00166617
2	rs6754311	G	A	ALLELIC	4136/5722	651/653	29.85	1	4.673e-08	0.041305
2	rs4972394	G	A	ALLELIC	653/9205	141/1163	30.58	1	3.199e-08	0.0282762
3	rs13072547	A	G	ALLELIC	3284/6574	329/975	34.37	1	4.554e-09	0.00402532
6	rs9458115	G	A	ALLELIC	101/9757	37/1267	31	1	2.584e-08	0.0228402
9	rs17382675	G	A	ALLELIC	1056/8790	210/1094	33.1	1	8.74e-09	0.00772536
10	rs11197830	G	A	ALLELIC	1319/8539	250/1054	31.98	1	1.559e-08	0.0137801
10	rs34201757	A	G	ALLELIC	146/9712	48/1256	32.64	1	1.111e-08	0.00982022
11	rs16914101	A	G	ALLELIC	167/9685	54/1250	35.48	1	2.573e-09	0.0022743
11	rs16914113	G	A	ALLELIC	144/9708	48/1256	33.53	1	7.001e-09	0.00618824
11	rs1838075	C	A	ALLELIC	148/9704	48/1256	31.67	1	1.827e-08	0.016149
11	rs1015307	A	G	ALLELIC	144/9708	48/1256	33.53	1	7.001e-09	0.00618824
11	rs16914165	C	A	ALLELIC	166/9686	51/1253	29.92	1	4.502e-08	0.0397935
15	rs12592594	G	A	ALLELIC	3303/6555	338/966	30.15	1	3.999e-08	0.0353475
16	rs7193174	A	G	ALLELIC	2108/7750	375/929	36.21	1	1.776e-09	0.00156982
21	rs926202	A	G	ALLELIC	3193/6665	531/773	35.95	1	2.022e-09	0.00178726
1	rs2819493	A	G	DOM	3248/1680	357/295	31.33	1	2.175e-08	0.0161335
2	rs4669685	A	G	DOM	2190/2739	367/285	32.61	1	1.125e-08	0.0083449
2	rs6739054	G	A	DOM	2467/2462	402/250	31.05	1	2.516e-08	0.0186629
2	rs7581382	G	A	DOM	1711/3218	147/505	38.38	1	5.813e-10	0.00043119
2	rs4954218	C	A	DOM	2045/2884	196/456	31.29	1	2.218e-08	0.0164524
7	rs10246805	A	G	DOM	1586/3343	279/373	29.16	1	6.67e-08	0.049476
8	rs11987006	A	G	DOM	1435/3492	258/394	29.72	1	4.988e-08	0.0369994
10	rs11197830	G	A	DOM	1220/3709	226/426	29.47	1	5.691e-08	0.0422141
16	rs7193174	A	G	DOM	1859/3070	325/327	35.58	1	2.452e-09	0.00181882
1	rs680331	G	A	GENO	45/1801/3082	24/190/438	46.49	2	8.047e-11	5.96902e-05
1	rs2819493	A	G	GENO	608/2640/1680	96/261/295	43.15	2	4.271e-10	0.00031681
2	rs4669685	A	G	GENO	334/1856/2739	77/290/285	41.73	2	8.693e-10	0.00064482
2	rs6739054	G	A	GENO	442/2025/2462	95/307/250	39.72	2	2.376e-09	0.00176244
2	rs7581382	G	A	GENO	200/1511/3218	16/131/505	38.44	2	4.489e-09	0.0033298
3	rs4267675	C	A	GENO	10/1258/3661	14/161/477	50.88	2	8.965e-12	6.64996e-06
3	rs13072547	A	G	GENO	555/2174/2200	40/249/363	34.11	2	3.911e-08	0.0290106
10	rs10906717	G	A	GENO	774/2400/1755	165/288/199	38.26	2	4.92e-09	0.0036495
10	rs11003013	G	A	GENO	73/1090/3766	29/166/457	33.63	2	4.981e-08	0.0369475
10	rs12220980	G	A	GENO	72/1078/3779	29/163/460	33.76	2	4.659e-08	0.034559
15	rs12592594	G	A	GENO	600/2103/2226	33/272/347	33.91	2	4.329e-08	0.0321112
16	rs7193174	A	G	GENO	249/1610/3070	50/275/327	36.72	2	1.065e-08	0.00789984
21	rs926202	A	G	GENO	535/2123/2271	113/305/234	35.93	2	1.575e-08	0.0116829
1	rs680331	G	A	REC	45/4883	24/628	36.12	1	1.855e-09	0.00137598
3	rs4267675	C	A	REC	10/4919	14/638	50.84	1	1.001e-12	7.42511e-07
10	rs10906717	G	A	REC	774/4155	165/487	37.95	1	7.252e-10	0.000537931
13	rs1333592	G	A	REC	146/4780	47/605	31.06	1	2.504e-08	0.0185739
2	rs4669685	A	G	TREND	2524/7334	444/860	41.46	1	1.204e-10	0.000106423
2	rs6739054	G	A	TREND	2909/6949	497/807	39.63	1	3.065e-10	0.000270918
2	rs7581382	G	A	TREND	1911/7947	163/1141	35.12	1	3.102e-09	0.00274188
3	rs13072547	A	G	TREND	3284/6574	329/975	34.08	1	5.276e-09	0.0046635
6	rs9458115	G	A	TREND	101/9757	37/1267	30.93	1	2.674e-08	0.0236357
9	rs7030346	A	G	TREND	1089/8757	211/1093	29.67	1	5.135e-08	0.0453887
9	rs17382675	G	A	TREND	1056/8790	210/1094	32.07	1	1.489e-08	0.0131614
10	rs11197830	G	A	TREND	1319/8539	250/1054	31.39	1	2.115e-08	0.0186947
10	rs34201757	A	G	TREND	146/9712	48/1256	32.53	1	1.174e-08	0.0103771
11	rs16914101	A	G	TREND	167/9685	54/1250	35.54	1	2.492e-09	0.0022027
11	rs16914113	G	A	TREND	144/9708	48/1256	33.77	1	6.209e-09	0.00548818
11	rs1838075	C	A	TREND	148/9704	48/1256	31.91	1	1.615e-08	0.0142751
11	rs1015307	A	G	TREND	144/9708	48/1256	33.77	1	6.209e-09	0.00548818
11	rs16914165	C	A	TREND	166/9686	51/1253	30.24	1	3.826e-08	0.0338183
16	rs7193174	A	G	TREND	2108/7750	375/929	35.37	1	2.728e-09	0.0024113
21	rs926202	A	G	TREND	3193/6665	531/773	35.19	1	2.986e-09	0.00263935
