# Supplementary material for: Evaluation of Density-Based Spatial Clustering for Identifying Genomic Loci Associated with Ischemic Stroke in Genome-Wide Data
Source: Int J Mol Sci. 2023 Oct 19;24(20):15355. doi: 10.3390/ijms242015355 (PMC10607504; doi:10.3390/ijms242015355)
Supplement: Supplementary file 1 [file ijms-24-15355-s001.zip › Table_S4.xls]

## Sheet: ann
V1	V2	V3	V4	V5	V6	V7	V8	V9	V10	V11
1	209959872	rs680331	A	G	G	downstream_gene_variant	MODIFIER	TRAF3IP3	protein_coding	c.*4379A>G
1	209959872	rs680331	A	G	G	upstream_gene_variant	MODIFIER	C1orf74	protein_coding	c.-2225T>C
1	209959872	rs680331	A	G	G	3_prime_UTR_variant	MODIFIER	IRF6	protein_coding	c.*1893T>C
1	227689829	rs2819493	G	A	A	intergenic_region	MODIFIER	TUBB8P10-TUBB8P9		n.227689829G>A
2	11213936	rs4669685	G	A	A	intergenic_region	MODIFIER	KCNF1-AC062028.1		n.11213936G>A
2	11220562	rs6739054	A	G	G	intergenic_region	MODIFIER	KCNF1-AC062028.1		n.11220562A>G
2	135775130	rs7581382	A	G	G	intron_variant	MODIFIER	MAP3K19	protein_coding	c.138+4155T>C
2	135803425	rs4954218	A	C	C	intragenic_variant	MODIFIER	MAP3K19		n.135803425T>G
2	136707982	rs6754311	A	G	G	intron_variant	MODIFIER	DARS	protein_coding	c.321-6932T>C
2	173889333	rs4972394	A	G	G	intron_variant	MODIFIER	RAPGEF4	protein_coding	c.2254-1967A>G
3	51147807	rs4267675	A	C	C	intron_variant	MODIFIER	DOCK3	protein_coding	c.746+19992A>C
3	55943591	rs13072547	G	A	A	intron_variant	MODIFIER	ERC2	protein_coding	c.2404-21014C>T
6	161504848	rs9458115	A	G	G	intron_variant	MODIFIER	MAP3K4	protein_coding	c.2256-685A>G
7	38156102	rs10246805	G	A	A	intergenic_region	MODIFIER	SFRP4-STARD3NL		n.38156102G>A
8	40834880	rs11987006	G	A	A	intergenic_region	MODIFIER	RP11-465K16.1-RNU6-356P		n.40834880G>A
9	13777299	rs7030346	G	A	A	intergenic_region	MODIFIER	RP11-536O18.1-LINC00583		n.13777299G>A
9	130404935	rs17382675	A	G	G	intron_variant	MODIFIER	STXBP1	protein_coding	c.38-8947A>G
10	14666221	rs10906717	A	G	G	intron_variant	MODIFIER	FAM107B	protein_coding	c.469+43412T>C
10	81230989	rs11003013	A	G	G	intergenic_region	MODIFIER	ZCCHC24-TPRX1P1		n.81230989A>G
10	81232447	rs12220980	A	G	G	intergenic_region	MODIFIER	ZCCHC24-TPRX1P1		n.81232447A>G
10	84984421	rs11197830	A	G	G	intergenic_region	MODIFIER	RNU6-478P-MARK2P15		n.84984421A>G
10	125444550	rs34201757	G	A	A	intron_variant	MODIFIER	GPR26	protein_coding	c.783-2895G>A
11	25563493	rs16914101	G	A	A	intergenic_region	MODIFIER	AC015820.1-RPL36AP40		n.25563493G>A
11	25568204	rs16914113	A	G	G	intergenic_region	MODIFIER	AC015820.1-RPL36AP40		n.25568204A>G
11	25569848	rs1838075	A	C	C	intergenic_region	MODIFIER	AC015820.1-RPL36AP40		n.25569848A>C
11	25586000	rs1015307	G	A	A	intergenic_region	MODIFIER	AC015820.1-RPL36AP40		n.25586000G>A
11	25616540	rs16914165	A	C	C	intergenic_region	MODIFIER	RPL36AP40-RP11-46P12.1		n.25616540A>C
13	83198951	rs1333592	A	G	G	intergenic_region	MODIFIER	PTMAP5-GYG1P2		n.83198951A>G
15	48009994	rs12592594	A	G	G	intragenic_variant	MODIFIER	SEMA6D		n.48009994A>G
15	48009994	rs12592594	A	G	G	upstream_gene_variant	MODIFIER	SEMA6D	protein_coding	c.-1131A>G
16	85505866	rs7193174	G	A	A	intergenic_region	MODIFIER	AC092377.1-RP11-118F19.1		n.85505866G>A
21	37128336	rs926202	G	A	A	intragenic_variant	MODIFIER	RUNX1		n.37128336C>T

## Sheet: genes
rs680331	downstream_gene_variant	TRAF3IP3
rs680331	upstream_gene_variant	C1orf74
rs680331	3_prime_UTR_variant	IRF6
rs2819493	intergenic_region	TUBB8P10
rs2819493	intergenic_region	TUBB8P9
rs4669685	intergenic_region	KCNF1
rs4669685	intergenic_region	AC062028.1
rs6739054	intergenic_region	KCNF1
rs6739054	intergenic_region	AC062028.1
rs7581382	intron_variant	MAP3K19
rs4954218	intragenic_variant	MAP3K19
rs6754311	intron_variant	DARS
rs4972394	intron_variant	RAPGEF4
rs4267675	intron_variant	DOCK3
rs13072547	intron_variant	ERC2
rs9458115	intron_variant	MAP3K4
rs10246805	intergenic_region	SFRP4
rs10246805	intergenic_region	STARD3NL
rs11987006	intergenic_region	RP11-465K16.1
rs11987006	intergenic_region	RNU6-356P
rs7030346	intergenic_region	RP11-536O18.1
rs7030346	intergenic_region	LINC00583
rs17382675	intron_variant	STXBP1
rs10906717	intron_variant	FAM107B
rs11003013	intergenic_region	ZCCHC24
rs11003013	intergenic_region	TPRX1P1
rs12220980	intergenic_region	ZCCHC24
rs12220980	intergenic_region	TPRX1P1
rs11197830	intergenic_region	RNU6-478P
rs11197830	intergenic_region	MARK2P15
rs34201757	intron_variant	GPR26
rs16914101	intergenic_region	AC015820.1
rs16914101	intergenic_region	RPL36AP40
rs16914113	intergenic_region	AC015820.1
rs16914113	intergenic_region	RPL36AP40
rs1838075	intergenic_region	AC015820.1
rs1838075	intergenic_region	RPL36AP40
rs1015307	intergenic_region	AC015820.1
rs1015307	intergenic_region	RPL36AP40
rs16914165	intergenic_region	RPL36AP40
rs16914165	intergenic_region	RP11-46P12.1
rs1333592	intergenic_region	PTMAP5
rs1333592	intergenic_region	GYG1P2
rs12592594	intragenic_variant	SEMA6D
rs12592594	upstream_gene_variant	SEMA6D
rs7193174	intergenic_region	AC092377.1
rs7193174	intergenic_region	RP11-118F19.1
rs926202	intragenic_variant	RUNX1
