# Supplementary material for: Evaluation of Density-Based Spatial Clustering for Identifying Genomic Loci Associated with Ischemic Stroke in Genome-Wide Data
Source: Int J Mol Sci. 2023 Oct 19;24(20):15355. doi: 10.3390/ijms242015355 (PMC10607504; doi:10.3390/ijms242015355)
Supplement: Supplementary file 1 [file ijms-24-15355-s001.zip › Table_S5.xlsx]

## Sheet: Sheet1
LINC00583	long intergenic non-protein coding RNA 583(LINC00583)
DOCK3	dedicator of cytokinesis 3(DOCK3)
TRAF3IP3	TRAF3 interacting protein 3(TRAF3IP3)
GPR26	G protein-coupled receptor 26(GPR26)
STXBP1	syntaxin binding protein 1(STXBP1)
TUBB8P10	tubulin beta 8 class VIII pseudogene 10(TUBB8P10)
C1ORF74	chromosome 1 open reading frame 74(C1orf74)
FAM107B	family with sequence similarity 107 member B(FAM107B)
TUBB8P9	tubulin beta 8 class VIII pseudogene 9(TUBB8P9)
RNU6-478P	RNA, U6 small nuclear 478, pseudogene(RNU6-478P)
MARK2P15	MARK2 pseudogene 15(MARK2P15)
ERC2	ELKS/RAB6-interacting/CAST family member 2(ERC2)
RPL36AP40	ribosomal protein L36a pseudogene 40(RPL36AP40)
MAP3K4	mitogen-activated protein kinase kinase kinase 4(MAP3K4)
ZCCHC24	zinc finger CCHC-type containing 24(ZCCHC24)
KCNF1	potassium voltage-gated channel modifier subfamily F member 1(KCNF1)
STARD3NL	STARD3 N-terminal like(STARD3NL)
SEMA6D	semaphorin 6D(SEMA6D)
TPRX1P1	tetrapeptide repeat homeobox 1 pseudogene 1(TPRX1P1)
RUNX1	RUNX family transcription factor 1(RUNX1)
SFRP4	secreted frizzled related protein 4(SFRP4)
GYG1P2	glycogenin 1 pseudogene 2(GYG1P2)
MAP3K19	mitogen-activated protein kinase kinase kinase 19(MAP3K19)
PTMAP5	prothymosin alpha pseudogene 5(PTMAP5)
IRF6	interferon regulatory factor 6(IRF6)
RNU6-356P	RNA, U6 small nuclear 356, pseudogene(RNU6-356P)
RAPGEF4	Rap guanine nucleotide exchange factor 4(RAPGEF4)
RP11-46P12.1
AC062028.1
AC092377.1
RP11-536O18.1
DARS
RP11-465K16.1
RP11-118F19.1
AC015820.1
