# Supplementary material for: Evaluation of Density-Based Spatial Clustering for Identifying Genomic Loci Associated with Ischemic Stroke in Genome-Wide Data
Source: Int J Mol Sci. 2023 Oct 19;24(20):15355. doi: 10.3390/ijms242015355 (PMC10607504; doi:10.3390/ijms242015355)
Supplement: Supplementary file 1 [file ijms-24-15355-s001.zip › Table_S6.xls]

## Sheet: DBSCAN
RP11-544M22.13
F11R
ARHGAP30
TSTD1
USF1
PVRL4
AL591806.1
CD34
KIF26B
CNTNAP5
MAP3K19
RAB3GAP1
ZRANB3
R3HDM1
UBXN4
LCT
AC011893.3
MCM6
DARS
AC093391.2
PARD3B
CACNA2D3
ERC2
UPK1B
RP11-484M3.5
SLC41A3
RP11-44F21.2
PARM1
UNC5C
TSPAN5
GUSBP5
FREM3
FSTL5
BRD9
TRIP13
FBXL7
CTD-2350J17.1
OSMR
GZMAP1
GZMA
CDC20B
GPX8
MCIDAS
CCNO
RP11-506H20.1
DHX29
SKIV2L2
PPAP2A
FSTL4
PCDHGA3
PCDHGB3
PCDHGB2
PCDHGA4
PCDHGA2
PCDHGA1
PCDHGB1
PCDHGA6
PCDHGA5
PCDHGA9
PCDHGB7
PCDHGA10
PCDHGB6
PCDHGA7
PCDHGA8
PCDHGB4
DIAPH1
CTD-2024I7.13
RP3-399L15.3
HS3ST5
DNAJA1P4
RP3-399L15.1
RP3-428L16.1
MAP3K4
LHFPL3
FAM107B
DCLRE1CP1
WDFY4
RP11-523O18.5
LIPA
IFIT2
RP11-282I1.2
CAPN5
OMP
RP11-26L16.1
SEMA6D
GLCE
CCDC64B
THOC6
RP11-473M20.5
MMP25
RP11-31I22.4
ASIC2
PHB
RP11-81K2.1
RP11-449D8.1
RP11-449D8.2
RP11-449D8.5
RUNX1

## Sheet: HDBSCAN
PIGK
KCNA3
KCND3
RP11-88H9.2
RP11-544M22.13
F11R
ARHGAP30
TSTD1
USF1
PVRL4
AL591806.1
RP11-328D5.1
CD34
KIF26B
RP11-481J13.1
AC011306.1
RP11-482H16.1
CNTNAP5
MAP3K19
RAB3GAP1
ZRANB3
R3HDM1
UBXN4
LCT
AC011893.3
MCM6
DARS
AC093391.2
PARD3B
ERC2
PVRL3
CD96
UPK1B
RP11-484M3.5
SLC41A3
RP11-44F21.2
PARM1
UNC5C
TSPAN5
GUSBP5
FREM3
BRD9
ZDHHC11
TRIP13
FBXL7
CTD-2350J17.1
OSMR
GZMAP1
GZMA
CDC20B
GPX8
MCIDAS
CCNO
RP11-506H20.1
DHX29
SKIV2L2
PPAP2A
SLC27A6
ISOC1
FSTL4
PCDHGA3
PCDHGB3
PCDHGB2
PCDHGA4
PCDHGA2
PCDHGA1
PCDHGB1
PCDHGA6
PCDHGA5
PCDHGA9
PCDHGB7
PCDHGA10
PCDHGB6
PCDHGA7
PCDHGA8
PCDHGB4
DIAPH1
CTD-2024I7.13
DUSP22
IRF4
RP3-399J4.4
GRIK2
RP3-399L15.3
HS3ST5
DNAJA1P4
RP3-399L15.1
RP3-428L16.1
MAP3K4
ELMO1
LHFPL3
HEY1
RP11-26J3.1
RP11-27N21.3
AKNA
FAM107B
LIPA
IFIT2
RP11-57H14.3
NOX4
RP11-745I13.1
RP11-81H14.2
RP11-588H23.3
PTPRB
CASC18
SEMA6D
CLDN6
CLDN9
CCDC64B
THOC6
RP11-473M20.5
MMP25
ASIC2
RP11-31I22.1
RP11-31I22.4
RP11-31I22.3
PHB
RP11-81K2.1
RP11-449D8.1
RP11-449D8.2
RP11-449D8.5
MBP
RUNX1

## Sheet: common
RP11-544M22.13
F11R
ARHGAP30
TSTD1
USF1
PVRL4
AL591806.1
CD34
KIF26B
CNTNAP5
MAP3K19
RAB3GAP1
ZRANB3
R3HDM1
UBXN4
LCT
AC011893.3
MCM6
DARS
AC093391.2
PARD3B
ERC2
UPK1B
RP11-484M3.5
SLC41A3
RP11-44F21.2
PARM1
UNC5C
TSPAN5
GUSBP5
FREM3
BRD9
TRIP13
FBXL7
CTD-2350J17.1
OSMR
GZMAP1
GZMA
CDC20B
GPX8
MCIDAS
CCNO
RP11-506H20.1
DHX29
SKIV2L2
PPAP2A
FSTL4
PCDHGA3
PCDHGB3
PCDHGB2
PCDHGA4
PCDHGA2
PCDHGA1
PCDHGB1
PCDHGA6
PCDHGA5
PCDHGA9
PCDHGB7
PCDHGA10
PCDHGB6
PCDHGA7
PCDHGA8
PCDHGB4
DIAPH1
CTD-2024I7.13
RP3-399L15.3
HS3ST5
DNAJA1P4
RP3-399L15.1
RP3-428L16.1
MAP3K4
LHFPL3
FAM107B
LIPA
IFIT2
SEMA6D
CCDC64B
THOC6
RP11-473M20.5
MMP25
RP11-31I22.4
ASIC2
PHB
RP11-81K2.1
RP11-449D8.1
RP11-449D8.2
RP11-449D8.5
RUNX1
